# Supplementary material
Source: PubMed Central journal article supplement (PMC6616257)
Supplement: baADV2019000030-suppl1.pdf [file baADV2019000030-suppl1.pdf]

**Impact of ATG formulations on outcomes**

As we did not have information of the brand of ATG, we performed following subgroup analysis by assuming that ATG at dose <16mg/Kg is Thymoglobin and dose 16 to 60 mg/Kg is Grafalon. These results should be interpreted with caution.

Supplementary table S1: Multivariate analysis of outcomes based on presumed ATG formulations based on dosages.

|                           | RI                 |          | NRM                 |         | LFS                 |          | OS                  |          | GRFS               |          |
|---------------------------|--------------------|----------|---------------------|---------|---------------------|----------|---------------------|----------|--------------------|----------|
|                           | HR (95% CI)        | p        | HR (95% CI)         | p       | HR (95% CI)         | p        | HR (95% CI)         | p        | HR (95% CI)        | p        |
| <b>No ATG (reference)</b> |                    |          |                     |         |                     |          |                     |          |                    |          |
| Thymoglobin vs no         | 1.51 (0.82-2.78)   | 0.186    | 0.445 (0.222-0.892) | 0.0224  | 0.853 (0.557-1.31)  | 0.466    | 0.785 (0.505-1.22)  | 0.281    | 0.789 (0.542-1.15) | 0.214    |
| Grafalon vs no            | 1.45 (0.847-2.47)  | 0.176    | 0.496 (0.252-0.974) | 0.0417  | 0.899 (0.614-1.32)  | 0.587    | 0.868 (0.583-1.29)  | 0.485    | 0.78 (0.554-1.1)   | 0.155    |
| age (per 10y)             | 1.09 (0.952-1.26)  | 0.206    | 1.21 (1-1.46)       | 0.048   | 1.12 (1.01-1.25)    | 0.0368   | 1.13 (1.01-1.27)    | 0.0348   | 1.08 (0.982-1.19)  | 0.111    |
| Year of Tx                | 1.03 (0.96-1.1)    | 0.426    | 1.03 (0.942-1.12)   | 0.533   | 1.03 (0.981-1.09)   | 0.213    | 1.05 (0.991-1.11)   | 0.102    | 1.03 (0.983-1.08)  | 0.223    |
| <b>status at Tx</b>       |                    |          |                     |         |                     |          |                     |          |                    |          |
| CR2+ vs CR1               | 0.956 (0.597-1.53) | 0.851    | 1.19 (0.703-2.03)   | 0.512   | 1.06 (0.754-1.49)   | 0.733    | 1.08 (0.758-1.54)   | 0.667    | 1 (0.748-1.34)     | 0.99     |
| advanced vs CR1           | 2.36 (1.59-3.49)   | 1.91e-05 | 1.05 (0.536-2.05)   | 0.893   | 1.8 (1.3-2.5)       | 0.000415 | 1.73 (1.23-2.43)    | 0.00158  | 1.61 (1.2-2.17)    | 0.0017   |
| <b>cytogenetics</b>       |                    |          |                     |         |                     |          |                     |          |                    |          |
| interm. vs favorable      | 1.25 (0.734-2.14)  | 0.41     | 1.23 (0.676-2.24)   | 0.497   | 1.22 (0.825-1.79)   | 0.323    | 1.31 (0.872-1.97)   | 0.192    | 1.07 (0.781-1.46)  | 0.682    |
| poor vs favorable         | 2.88 (1.67-4.96)   | 0.000138 | 1.42 (0.727-2.78)   | 0.305   | 2.21 (1.48-3.32)    | 0.00012  | 2.34 (1.53-3.59)    | 0.00009  | 1.57 (1.12-2.2)    | 0.000935 |
| KPS>=90 % vs <90%         | 0.79 (0.543-1.15)  | 0.219    | 0.517 (0.329-0.813) | 0.00424 | 0.695 (0.529-0.914) | 0.00918  | 0.641 (0.484-0.849) | 0.000193 | 0.802 (0.628-1.03) | 0.00786  |
| <b>Donor type</b>         |                    |          |                     |         |                     |          |                     |          |                    |          |
| UD 10/10 vs MSD           | 0.708 (0.438-1.14) | 0.159    | 2.87 (1.68-4.9)     | 0.00011 | 1.24 (0.887-1.73)   | 0.21     | 1.39 (0.983-1.96)   | 0.0622   | 1.13 (0.839-1.52)  | 0.424    |
| UD 9/10 vs MSD            | 0.728 (0.388-1.37) | 0.322    | 2.72 (1.36-5.45)    | 0.00463 | 1.23 (0.787-1.91)   | 0.368    | 1.34 (0.849-2.13)   | 0.207    | 1.46 (0.99-2.15)   | 0.0563   |

|                     |                       |            |                       |            |                       |            |                       |           |                       |            |
|---------------------|-----------------------|------------|-----------------------|------------|-----------------------|------------|-----------------------|-----------|-----------------------|------------|
| PB vs BM            | 1.64<br>(1.03-2.63)   | 0.03<br>87 | 1.09<br>(0.641-1.85)  | 0.75<br>3  | 1.4 (1-1.95)          | 0.04<br>8  | 1.45<br>(1.02-2.05)   | 0.0<br>39 | 1.33<br>(1.01-1.77)   | 0.0<br>443 |
| F->M vs other       | 0.892<br>(0.603-1.32) | 0.56<br>7  | 1.44<br>(0.903-2.29)  | 0.12<br>6  | 1.07<br>(0.801-1.44)  | 0.63<br>5  | 1.13<br>(0.832-1.53)  | 0.4<br>34 | 1.2<br>(0.939-1.54)   | 0.1<br>44  |
| Pat. CMV pos vs neg | 0.852<br>(0.617-1.18) | 0.32<br>9  | 1.64<br>(1.06-2.55)   | 0.02<br>74 | 1.04<br>(0.812-1.34)  | 0.74<br>1  | 1.1<br>(0.848-1.44)   | 0.4<br>63 | 1.07<br>(0.861-1.33)  | 0.5<br>46  |
| Don. CMV pos vs neg | 0.735<br>(0.532-1.02) | 0.06<br>28 | 0.938<br>(0.617-1.43) | 0.76<br>4  | 0.803<br>(0.625-1.03) | 0.08<br>64 | 0.868<br>(0.667-1.13) | 0.2<br>9  | 0.858<br>(0.692-1.07) | 0.1<br>65  |
| FluTBI vs CyTBI     | 0.645<br>(0.344-1.21) | 0.17       | 0.976<br>(0.461-2.07) | 0.95       | 0.765<br>(0.488-1.2)  | 0.24<br>2  | 0.694<br>(0.427-1.13) | 0.1<br>4  | 1.03<br>(0.715-1.5)   | 0.8<br>59  |
| center (frailty)    |                       | 0.21<br>1  |                       | 0.18<br>1  |                       | 0.9        |                       | 0.9<br>02 |                       | 0.2<br>55  |

|                           | acute GVHD II-IV        |              | acute GVHD III-IV      |              | chronic GVHD           |            | ext. Chronic GVHD     |       |
|---------------------------|-------------------------|--------------|------------------------|--------------|------------------------|------------|-----------------------|-------|
|                           | HR (95% CI)             | p            | HR (95% CI)            | p            | HR (95% CI)            | p          | HR (95% CI)           | p     |
| <b>No ATG (reference)</b> |                         |              |                        |              |                        |            |                       |       |
| Thymoglobin vs no         | 0.372<br>(0.218-0.634)  | 0.000<br>274 | 0.269<br>(0.113-0.642) | 0.003<br>1   | 0.587<br>(0.351-0.981) | 0.04<br>22 | 0.548<br>(0.26-1.16)  | 0.114 |
| Grafalon vs no            | 0.176<br>(0.0935-0.333) | 8.35e-08     | 0.2<br>(0.0789-0.508)  | 0.000<br>711 | 0.68<br>(0.414-1.12)   | 0.12<br>7  | 0.759<br>(0.374-1.54) | 0.444 |
| age (per 10y)             | 0.888<br>(0.767-1.03)   | 0.116        | 0.84<br>(0.666-1.06)   | 0.141        | 1.13 (1-1.28)          | 0.04<br>41 | 1.09<br>(0.923-1.29)  | 0.305 |
| Year of Tx                | 1.05 (0.988-1.13)       | 0.112        | 1.04<br>(0.937-1.15)   | 0.483        | 1.01<br>(0.949-1.07)   | 0.83<br>4  | 0.985<br>(0.907-1.07) | 0.725 |
| <b>status at Tx</b>       |                         |              |                        |              |                        |            |                       |       |
| CR2+ vs CR1               | 0.769<br>(0.484-1.22)   | 0.267        | 0.808<br>(0.397-1.64)  | 0.556        | 0.602<br>(0.406-0.893) | 0.01<br>17 | 0.843<br>(0.505-1.41) | 0.515 |
| advanced vs CR1           | 1.61 (1.04-2.49)        | 0.032<br>2   | 1.43<br>(0.716-2.87)   | 0.309        | 1.12<br>(0.717-1.76)   | 0.61<br>3  | 0.959<br>(0.513-1.79) | 0.896 |
| <b>cytogenetics</b>       |                         |              |                        |              |                        |            |                       |       |
| interm. vs favorable      | 1.43 (0.883-2.32)       | 0.146        | 1.15<br>(0.563-2.36)   | 0.699        | 0.944<br>(0.635-1.4)   | 0.77<br>6  | 0.889<br>(0.526-1.5)  | 0.659 |
| poor vs favorable         | 1.02 (0.593-1.76)       | 0.94         | 1.08<br>(0.481-2.4)    | 0.86         | 0.665<br>(0.419-1.05)  | 0.08<br>29 | 0.592<br>(0.314-1.12) | 0.106 |
| KPS>=90% vs <90%          | 0.874<br>(0.592-1.29)   | 0.497        | 0.985<br>(0.533-1.82)  | 0.962        | 1.07<br>(0.763-1.5)    | 0.69<br>2  | 0.839<br>(0.532-1.32) | 0.45  |

| Donor type           |                    |          |                   |          |                    |         |                    |          |
|----------------------|--------------------|----------|-------------------|----------|--------------------|---------|--------------------|----------|
| UD 10/10 vs MSD      | 3.39 (2.24-5.13)   | 8.77e-09 | 2.98 (1.61-5.5)   | 0,0005   | 1.29 (0.875-1.89)  | 0.199   | 0.732 (0.424-1.26) | 0.261    |
| UD 9/10 vs MSD       | 2.82 (1.54-5.18)   | 0.000808 | 4.96 (2.15-11.4)  | 0.000173 | 1.52 (0.915-2.52)  | 0.106   | 1.02 (0.488-2.14)  | 0.956    |
| PB vs BM             | 1.02 (0.664-1.56)  | 0.936    | 1.46 (0.727-2.94) | 0.288    | 0.977 (0.685-1.39) | 0.899   | 1.39 (0.84-2.31)   | 0.199    |
| F->M vs other        | 1.06 (0.716-1.57)  | 0.767    | 1.06 (0.584-1.94) | 0.84     | 1.41 (1.03-1.93)   | 0.0339  | 1.35 (0.89-2.04)   | 0.159    |
| Pat. CMV pos vs neg  | 0.932 (0.669-1.3)  | 0.679    | 1.37 (0.803-2.36) | 0.246    | 1.08 (0.817-1.42)  | 0.595   | 1.3 (0.88-1.92)    | 0.187    |
| Don. CMV pos vs neg. | 1.22 (0.879-1.69)  | 0.236    | 1.54 (0.915-2.58) | 0.104    | 1.02 (0.776-1.34)  | 0.886   | 0.79 (0.539-1.16)  | 0.228    |
| FluTBI vs CyTBI      | 0.705 (0.351-1.42) | 0.327    | 0.446 (0.13-1.52) | 0.198    | 1.27 (0.757-2.14)  | 0.364   | 1.99 (1.01-3.95)   | 0.0482   |
| center (frailty)     |                    | 0.00877  |                   | 0.211    |                    | 0.00765 |                    | 0.000165 |

Supplementary table S2: Detailed description of other causes of death.

| <b>no ATG group</b>                                                        | <b>N=9</b> |
|----------------------------------------------------------------------------|------------|
| Pulmonary toxicity                                                         | 2          |
| MOF                                                                        | 1          |
| renal failure                                                              | 1          |
| Thrombotic Microangiopathy                                                 | 1          |
| GI toxicity                                                                | 1          |
| Liver failure                                                              | 1          |
| lymphoproliferative disorder                                               | 1          |
| progressive multiple leukoencephalopathy due to rituximab (GVHD treatment) | 1          |

| <b>ATG group</b>                                                                                   | <b>N=11</b> |
|----------------------------------------------------------------------------------------------------|-------------|
| MOF                                                                                                | 4           |
| toxic ARDS                                                                                         | 2           |
| Pulmonary hypertension after pulmonary embolism; suspicion of a seizure or syncope with aspiration | 1           |
| PTLD treated with Rituximab                                                                        | 1           |
| Liver toxicity                                                                                     | 1           |
| Lymphoproliferative disorder                                                                       | 1           |
| unknown                                                                                            | 1           |
| Total                                                                                              | 11          |

EBMT centers who contributed cases for this study.

| <b>2008-2016</b>                 | <b>N</b> |
|----------------------------------|----------|
| 515 Helsinki [Univ Central H]    | 44       |
| 209 Leuven [Univ H]              | 37       |
| 234 Brussels [St. Luc]           | 33       |
| 246 Rotterdam [Erasmus MC]       | 31       |
| 556 Budapest [National Med Ctr]  | 30       |
| 666 Villejuif [Gustave Roussy]   | 23       |
| 726 Liege [University]           | 21       |
| 387 Birmingham [Queen Elizabeth] | 19       |
| 744 Gent [Univ H]                | 15       |
| 996 Antwerp_Edegem [UZA]         | 15       |
| 225 Turku [University]           | 14       |
| 259 Essen [Univ H]               | 14       |
| 671 Lyon [H E Herriot]           | 14       |
| 252 Creteil [H Mondor Hematol]   | 13       |
| 389 Leipzig [Univ, Haemat/Oncol] | 13       |
| 260 Barcelona [SCreu i S Pau]    | 12       |
| 614 Hamburg [Univ H]             | 12       |
| 661 Rennes [H Sud/Pontchaillou]  | 12       |
| 397 Riyadh [King Faisal]         | 11       |
| 625 Nuernberg [Klinikum]         | 11       |
| 262 Paris [Pitie-Salpetriere]    | 10       |
| 283 Lund [Univ H]                | 10       |
| 623 Verona [Policlinico]         | 10       |
| 145 Stuttgart [Robert_Bosch_Kh]  | 9        |
| 294 Milano [Osp Niguarda]        | 9        |
| 680 Muenster [University]        | 9        |
| 257 Dublin [St James]            | 8        |
| 656 Prague [Ist Hematology]      | 8        |
| 717 Nottingham [City H]          | 8        |
| 941 Rouen [Becquerel]            | 8        |
| 208 Zürich [208]                 | 7        |
| 214 Barcelona [H Clinic]         | 7        |
| 295 Hannover [Medical Univ]      | 7        |
| 759 Barcelona [H Univ Bellvitge] | 7        |
| 206 Copenhagen [Rigshospitalet]  | 6        |
| 250 Saint_Etienne [St Etienne]   | 6        |
| 807 Berlin [Charité Univ]        | 6        |
| 202 Basel [202]                  | 5        |

|                                     |   |
|-------------------------------------|---|
| 215 Brussels [Jules Bordet]         | 5 |
| 264 Poitiers [H La Miletrie]        | 5 |
| 277 Lille [H Claude Huriez]         | 5 |
| 775 Paris [St Antoine]              | 5 |
| 931 Suzhou [First Soochow]          | 5 |
| 205 London [Hammersmith]            | 4 |
| 224 London [UCL]                    | 4 |
| 251 Caen [Hopital, Hemato]          | 4 |
| 261 Geneva [261]                    | 4 |
| 272 Tours [H Bretonneau]            | 4 |
| 409 Petach-Tikva [Beilinson H]      | 4 |
| 580 Amman [King Hussein]            | 4 |
| 704 Southampton [General H]         | 4 |
| 778 Sheffield [Royal Hallamshire]   | 4 |
| 786 Mainz [Johannes-Gutenberg]      | 4 |
| 217 Genova [S Martino]              | 3 |
| 255 Oxford [Radcliffe H]            | 3 |
| 268 Belfast [City H]                | 3 |
| 270 Grenoble [H A Michallon]        | 3 |
| 297 Frankfurt am Main [Goethe-Univ] | 3 |
| 308 Graz [Medical Univ]             | 3 |
| 428 Gliwice [Skłodowska]            | 3 |
| 533 Jena [Friedrich-Schiller]       | 3 |
| 546 Groningen [Univ H]              | 3 |
| 665 Clamart [H Percy]               | 3 |
| 713 Leicester [Royal Infirmary]     | 3 |
| 768 London [S Bartholomew's]        | 3 |
| 994 Istanbul [Nightingale]          | 3 |
| 160 Paris [H Necker]                | 2 |
| 218 London [Royal Marsden]          | 2 |
| 223 Tuebingen [Univ]                | 2 |
| 233 Besancon [H Jean Minjoz]        | 2 |
| 239 Utrecht [University]            | 2 |
| 240 Bologna [S Orsola-Malpighi]     | 2 |
| 254 Leeds [St James]                | 2 |
| 258 Jerusalem [Univ Hadassah]       | 2 |
| 286 Pavia [S Matteo]                | 2 |
| 338 Halle [Univ Martin-Luther]      | 2 |
| 348 Aachen [RWTH]                   | 2 |
| 359 Magdeburg [vGuericke U]         | 2 |
| 513 Munich [KI Grosshadern]         | 2 |

|                                       |   |
|---------------------------------------|---|
| 524 Heidelberg [Medizinische KI]      | 2 |
| 606 Cuneo [S Croce e Carle]           | 2 |
| 624 Toulouse [H Purpan]               | 2 |
| 650 Angers [CHRU]                     | 2 |
| 658 Bergamo [Ospedale, ematol]        | 2 |
| 672 Strasbourg [H Hautepierre]        | 2 |
| 780 Manchester [Christie]             | 2 |
| 787 Regensburg [University]           | 2 |
| 808 Dresden [Universitaets KI]        | 2 |
| 141 Brescia [Civili, Adulti]          | 1 |
| 142 Mannheim [Univ]                   | 1 |
| 152 Augsburg [Zentral KI]             | 1 |
| 153 Hamburg [AK St Georg]             | 1 |
| 207 Paris [St Louis]                  | 1 |
| 212 Stockholm [Univ H]                | 1 |
| 227 Vienna [Medizinische Univ]        | 1 |
| 231 Torino [S. Giovanni (CTO)]        | 1 |
| 232 Rome [Emat, La Sapienza]          | 1 |
| 237 Nijmegen [St Radboud]             | 1 |
| 238 Córdoba [Reina Sofia]             | 1 |
| 244 Glasgow [Royal Infirmary]         | 1 |
| 248 Pescara [Osp Civile]              | 1 |
| 253 Nantes [Hotel Dieu]               | 1 |
| 265 Milano [Osp Maggiore]             | 1 |
| 289 Goeteborg [Sahlgrenska Univ H]    | 1 |
| 303 Cardiff [Univ Wales]              | 1 |
| 311 Wiesbaden [KI Diagnostik]         | 1 |
| 386 Bristol [Royal H Sick Chil]       | 1 |
| 444 Riyadh [Aziz]                     | 1 |
| 506 Brugge [AZ Sint-Jan]              | 1 |
| 523 Nice [H de l' ARCHET I]           | 1 |
| 526 San_Giovanni_Rotondo [IRCCS]      | 1 |
| 544 Monza [Osp S Gerardo]             | 1 |
| 553 Krakow [Jagiellonian Univ]        | 1 |
| 566 Cambridge [Addenbrookes H]        | 1 |
| 577 Pamplona [H de Navarra]           | 1 |
| 584 Barcelona [V d' Hebron Adults]    | 1 |
| 592 Idar-Oberstein [KI Knochenmarktr] | 1 |
| 594 Linz [Elisabethinen H]            | 1 |
| 597 Brno [Univ H]                     | 1 |
| 601 Manchester [Royal Infirmary]      | 1 |

|                                         |     |
|-----------------------------------------|-----|
| 613 Barcelona [H Trias i Pujol]         | 1   |
| 617 Ankara [Ibni Sina H]                | 1   |
| 634 Aarhus [Univ, Hematol]              | 1   |
| 676 Vandoeuvre_Les_Nancy [H d` Enfants] | 1   |
| 677 Katowice [Silesian Med Acad]        | 1   |
| 693 Warsaw [Inst Haematology]           | 1   |
| 729 Hradec_Králové [Charles U H, Hem]   | 1   |
| 754 Tel-Hashomer [Univ Adults]          | 1   |
| 858 Jeddah [King Faisal]                | 1   |
| 926 Montpellier [University]            | 1   |
| Total                                   | 724 |
